# Supplementary material for: Environmental quality and the role of economic policy uncertainty, economic complexity, renewable energy, energy intensity: the case of G7 countries
Source: Research Square preprint supplement (doi:10.21203/rs.3.rs-449086/v1), 2021-05-14
Supplement: Supplementary file 1 [file 3088417b07c63c7d82800671.docx]

**Appendix 1.** Pairwise correlation

|  | CO2 | EFP | GDPpc | ENE | REN | ECI | EPU |
| --- | --- | --- | --- | --- | --- | --- | --- |
| CO2 | 1.000 |  |  |  |  |  |  |
| EFP | 0.822*** | 1.000 |  |  |  |  |  |
| GDPpc | 0.339*** | 0.530*** | 1.000 |  |  |  |  |
| ENE | 0.810*** | 0.979*** | 0.609*** | 1.000 |  |  |  |
| REN | 0.083 | 0.440*** | 0.273*** | 0.372*** | 1.000 |  |  |
| ECI | -0.184** | -0.512*** | -0.159* | -0.418*** | -0.600*** | 1.000 |  |
| EPU | -0.217** | -0.084 | 0.279*** | -0.074 | 0.217** | -0.144* | 1 |

Note: ***, **, * indicate significance at the 1%, 5%, and 10% levels, respectively.

**Appendix 2.** Cross-sectional dependency test

|  | Carbon dioxide emissions | Ecological footprint |
| --- | --- | --- |
| Pesaran's test | 1.913* | 2.048** |
| Friedman's test | 22.028*** | 19.507*** |
| Frees' test | 1.256*** | 0.758*** |

Note: Null hypothesis of cross-sectional independence. ***, **, * indicate significance at the 1%, 5%, and 10% levels, respectively.

**Appendix 3.** Panel unit root test

Panel A. Pesaran

| Z[t-bar] | CO2 | EFP | GDPpc | ENE | REN | EPU | ECI |
| --- | --- | --- | --- | --- | --- | --- | --- |
| Level, 0 lag | -0.626 | -1.407* | -0.349 | -2.935*** | -1.215 | -3.624*** | -1.275 |
| Level, 1 lag | -0.141 | -0.670 | -1.001 | -0.848 | -0.321 | -1.232 | -0.688 |
| Level, 2 lag | 3.678 | 1.444 | 0.050 | 0.918 | 1.519 | -1.136 | -1.937** |
| First difference, 0 lag | -5.246*** | -7.483*** | -2.442*** | -8.455*** | -7.433*** | -10.084*** | -5.437*** |
| First difference, 1 lag | -3.907*** | -4.234*** | -1.359* | -6.482*** | -4.722*** | -5.222*** | -2.275*** |
| First difference, 2 lag | 1.032 | -1.560* | -0.871 | -0.865 | -1.282* | -2.501*** | -1.903** |

Note: Null hypothesis of all series are non-stationary. ***, **, * indicate significance at the 1%, 5%, and 10% levels, respectively.

Panel B. Levin-Lin-Chu

| Z[t-bar] | CO2 | EFP | GDPpc | ENE | REN | EPU | ECI |
| --- | --- | --- | --- | --- | --- | --- | --- |
| Level | -0.378 | 1.671 | 1.667 | 0.497 | 2.301 | -4.144*** | -0.006 |
| First difference, Constant | -7.866*** | -9.629*** | -6.217*** | -7.160*** | -9.955*** | -13.250*** | -8.786*** |

Note: Null hypothesis of all series are non-stationary. ***, **, * indicate significance at the 1%, 5%, and 10% levels, respectively.

Panel C. Im-Pesaran-Shin

| Z[t-bar] | CO2 | EFP | GDPpc | ENE | REN | EPU | ECI |
| --- | --- | --- | --- | --- | --- | --- | --- |
| Level | -0.937 | 2.190 | 1.396 | 0.209 | 3.508 | -2.422*** | 0.606 |
| First difference, Constant | -8.417*** | -8.748*** | -4.884*** | -8.339*** | -7.966*** | -11.281*** | -7.765*** |

Note: Null hypothesis of all series are non-stationary. ***, **, * indicate significance at the 1%, 5%, and 10% levels, respectively.

**Appendix 4.** Cointegration test

Panel A. Westerlund test

| Variance ratio | Carbon dioxide emissions | Ecological footprint |
| --- | --- | --- |
| Some panels | 1.465* | -1.461** |
| All panels | 21.637* | -0.854 |
| Trend | 1.752** | 1.332* |
| Demean | 1.497* | 1.999** |

Note: Alternative hypothesis that the panels are cointegrated. ***, **, * indicate significance at the 1%, 5%, and 10% levels, respectively.

Panel B. Pedroni test

|  | Carbon dioxide emissions | | Ecological footprint | |
| --- | --- | --- | --- | --- |
| Test statistics | Panel | Group | Panel | Group |
| *v* | -0.5561 |  | -1.272 |  |
| *rho* | 2.129** | 2.946*** | 1.74* | 2.709*** |
| *t* | -0.2147 | -0.346 | -2.302** | -2.523** |
| *adf* | 2.941*** | 2.961*** | -.5217 | -.9452 |

Note: Null hypothesis of no cointegration. ***, **, * indicate significance at the 1%, 5%, and 10% levels, respectively.

**Appendix 5.** Heteroskedasticity test

|  | Carbon dioxide emissions | Ecological footprint |
| --- | --- | --- |
| *Chi2* | 271.45*** | 118.30*** |

Note: Null hypothesis of no heteroskedasticity. ***, **, * indicate significance at the 1%, 5%, and 10% levels, respectively.

**Appendix 6.** Serrial correlation test

|  | Carbon dioxide emissions | Ecological footprint |
| --- | --- | --- |
| *Chi2* | 46.799*** | 21.206*** |

Note: Null hypothesis of no serrial correlation. ***, **, * indicate significance at the 1%, 5%, and 10% levels, respectively.

**Appendix 7.** Hausman test

|  | Carbon dioxide emissions | Ecological footprint |
| --- | --- | --- |
| *Chi2* | 119.81*** | 96.07*** |

Note: Null hypothesis of no fixed effect. ***, **, * indicate significance at the 1%, 5%, and 10% levels, respectively.
